# Supplementary material for: Inversion model of soil salinity in alfalfa covered farmland based on sensitive variable selection and machine learning algorithms
Source: PeerJ journal article supplement (doi:10.7717/peerj.18186), 2024-09-26
Supplement: Supplementary_Dataset_1.xlsx [file Supplementary_Dataset_1.xlsx]

## Sheet: spectral index
Number	Measured soil salinity content	NDVI	DVI	EVI	RVI	TVI	NDGI	GNDVI	PNDVI	GVI	SAVI	MSAVI	CRSI	ARVI	RDVI	OSAVI	NDSI	BI	S1	S2	S3	S4	S5	S6	SI1	SI2	SI3	SI4	SI	SI-T	COSRI
1	0.395842	0.797532	8532.14	4.23174	8.87809	545808	0.281109	0.665659	0.363399	8.87809	1.19624	0.887358	0.755174	0.866169	82.4903	0.925123	-0.797532	9675.97	1.36331	0.15373	1415.68	1264.55	828.533	5395.53	1445.77	9866.58	2213.12	960.766	1264.55	-853214	0.25395
2	0.562998	0.535473	7920.63	3.33819	3.30545	481990	0.0239789	0.518147	0.0386104	3.30545	0.803182	0.69746	0.717144	0.539247	65.1251	0.621142	-0.535473	11864.5	1.01056	0.00525041	3566.76	3453.69	3309.27	10824.4	3519	12400	4979.48	214.63	3453.69	-792063	0.256166
3	0.390078	0.823063	7930.3	4.73626	10.3035	516672	0.374644	0.648337	0.37189	10.3035	1.23453	0.90294	0.714458	0.91083	80.7907	0.954737	-0.823063	8823.97	1.51918	0.206092	1233.38	1050.63	589.104	3995.44	1263.8	9020.72	2058.51	1173.93	1050.63	-793030	0.27068
4	0.395842	0.84259	7784.21	5.61631	11.7057	493486	0.312444	0.719586	0.432757	11.7057	1.26382	0.914567	0.748872	0.954182	80.9871	0.977388	-0.84259	8542.33	1.72555	0.266203	804.35	955.133	657.287	4458.87	1004.58	8654.35	1566.87	674.142	955.133	-778421	0.241019
5	0.482302	0.677276	8146.74	4.91989	5.19726	525323	0.190406	0.558952	0.171042	5.19726	1.01587	0.807583	0.700266	0.735718	74.2805	0.78563	-0.677276	10272.7	1.20866	0.0944747	2361.24	2133.88	1595.5	6860.65	2353.6	10661.8	3451.43	1044.78	2133.88	-814674	0.292782
6	0.390078	0.796008	7445.16	6.32322	8.8043	480756	0.308491	0.646198	0.328032	8.8043	1.19395	0.886413	0.705111	0.90535	76.9831	0.923353	-0.796008	8453.14	1.56264	0.219554	1155.2	1192.53	787.816	4438.76	1312.28	8643.74	2041.73	907.386	1192.53	-744516	0.280499
7	0.53706	0.546453	7366.51	3.88538	3.40969	455782	0.0533842	0.507885	0.0378913	3.40969	0.819649	0.706708	0.700219	0.563449	63.4464	0.633878	-0.546453	10862.6	1.04794	0.0234078	3246.22	3129.45	2878.88	9367.04	3224.83	11382.8	4573.62	397.735	3129.45	-736651	0.26776
8	0.554352	0.383586	6202.75	2.24801	2.24457	365668	-0.0165645	0.397624	-0.124367	2.24457	0.575362	0.55447	0.65913	0.348167	48.778	0.444956	-0.383586	12246.6	0.914759	-0.0445179	5270.69	4766.69	4712.58	11563.4	4901.95	13161.5	6934.31	308.606	4766.69	-620275	0.222517
9	0.519768	0.557284	7827.32	5.67233	3.51757	490624	0.077805	0.501212	0.0334528	3.51757	0.835897	0.715704	0.676165	0.600182	66.0458	0.646443	-0.557284	11369.7	1.12111	0.0570965	3241.16	3291.96	2982.36	9357.43	3361.16	11936.3	4782.26	545.121	3291.96	-782732	0.282474
10	0.398724	0.642287	7806.78	10.3204	4.59107	486794	0.0956192	0.582438	0.133773	4.59107	0.96339	0.782177	0.700195	0.734164	70.8109	0.745043	-0.642287	10214.7	1.29622	0.129003	2031.79	2475.07	2326.04	8238.6	2392.78	10548.8	3414.98	495.252	2475.07	-780678	0.288075
11	0.617756	0.326622	6645.09	-3.65852	1.9701	419276	0.0361789	0.293916	-0.241724	1.9701	0.489921	0.492402	0.477906	0.397723	46.5879	0.378879	-0.326622	15133.9	1.15109	0.0702375	6397.56	7349.17	7334.22	12552.6	7102.37	16830.5	10057.4	731.821	7349.17	-664509	0.244811
12	0.485184	0.605524	7725.67	5.5239	4.07002	479002	0.071326	0.558311	0.102823	4.07002	0.90825	0.754292	0.711296	0.656987	68.3965	0.702399	-0.605524	10546.8	1.15747	0.0729863	2508.1	2707.38	2524.9	8878.37	2702.87	10939	3841.92	386.676	2707.38	-772567	0.276017
13	0.427544	0.655782	7900	8.74773	4.81027	508281	0.171276	0.545811	0.129189	4.81027	0.983632	0.792103	0.669606	0.744739	71.9769	0.760697	-0.655782	10186.6	1.29624	0.129012	2260.66	2360.56	1901.55	7056.54	2464.88	10599.7	3589.68	890.745	2360.56	-790000	0.305821
14	0.424662	0.747564	8256.71	5.19157	6.92279	531291	0.243456	0.616267	0.26916	6.92279	1.12129	0.855543	0.718686	0.826609	78.5647	0.867161	-0.747564	9750.93	1.34285	0.146339	1706.28	1615.45	1138.97	5871.72	1787.22	10016.5	2682.04	990.344	1615.45	-825671	0.28179
15	0.684042	0.543955	7557.97	3.2463	3.38553	458246	0.0184641	0.530822	0.0530991	3.38553	0.815903	0.704615	0.726975	0.546245	64.1186	0.63098	-0.543955	11184.4	1.0065	0.00323806	3266.24	3178.53	3073.22	10337.3	3227.31	11657.5	4565.66	154.703	3178.53	-755797	0.25354
16	0.586054	0.338788	6501.4	-19.3624	2.02475	404120	0.0269108	0.314747	-0.216381	2.02475	0.508169	0.506102	0.52576	0.378731	46.9318	0.392991	-0.338788	14327.1	1.08763	0.0419753	6155.86	6616.53	6538.68	12172.5	6517.48	15814.3	9223.78	406.423	6616.53	-650140	0.240021
17	0.761856	0.288082	6536.22	-7.17509	1.80931	438913	0.067461	0.224994	-0.280999	1.80931	0.432114	0.447296	0.434363	0.325282	43.3932	0.334173	-0.288082	16695.8	1.07886	0.0379327	8569.02	8388.64	7611.82	12765.5	8640.77	19084.4	12275.6	1283.75	8388.64	-653622	0.228014
18	0.562998	0.349133	6742.46	-2.51163	2.07283	456461	0.0935887	0.264177	-0.245986	2.07283	0.523686	0.517557	0.412312	0.452552	48.5182	0.404991	-0.349133	14464	1.21878	0.0986034	6221.46	6938.27	6348.71	10797.5	6903.24	16331	9848.55	1300.12	6938.27	-674246	0.27556
19	0.534178	0.381082	7585.74	4.50046	2.23144	447910	-0.0148991	0.393745	-0.14314	2.23144	0.571608	0.551851	0.625358	0.383796	53.766	0.442051	-0.381082	15062.9	1.00634	0.0031594	5941.51	6179.53	6386.6	14161.6	6068.93	16206.3	8584.67	284.731	6179.53	-758574	0.233143
20	0.58029	0.394266	7105.66	2.26811	2.30178	420452	-0.0136677	0.405747	-0.113067	2.30178	0.591383	0.565544	0.664757	0.359519	52.9294	0.457345	-0.394266	13698.6	0.915612	-0.0440526	5800.73	5223.03	5136.3	12912.3	5384.32	14692.2	7616	346.271	5223.03	-710566	0.225523
21	0.430426	0.635596	7802.98	2.45505	4.48841	484493	0.0835499	0.583006	0.181841	4.48841	0.953355	0.777195	0.779868	0.61351	70.424	0.737281	-0.635596	10286	0.924877	-0.0390275	2859.5	2151.17	1749.75	8491.52	2432.22	10620.5	3463.78	705.682	2151.17	-780298	0.24403
22	0.413134	0.66803	8025.39	8.89619	5.02464	510780	0.154979	0.572302	0.153676	5.02464	1.002	0.800973	0.686898	0.761356	73.2202	0.774904	-0.66803	10216	1.31922	0.137641	2065.99	2290.33	1924.64	7330.57	2331.27	10573.3	3377.07	737.559	2290.33	-802539	0.297834
23	0.574526	0.555114	8032.29	4.36194	3.49553	515542	0.115441	0.469778	0.0232895	3.49553	0.832642	0.713912	0.664056	0.581644	66.7745	0.643925	-0.555114	11702.3	1.07541	0.0363339	3774.18	3337.82	2744.92	8922.16	3614.4	12386.2	5180.11	1030.86	3337.82	-803229	0.288504
24	0.372786	0.851402	7764.66	5.43445	12.4591	507681	0.435393	0.66106	0.403058	12.4591	1.27703	0.919733	0.686915	0.961977	81.3071	0.987609	-0.851402	8469.4	1.75854	0.27498	979.586	898.561	468.705	3320.73	1080.4	8642.82	1851.12	1172.24	898.561	-776466	0.272064
25	0.413134	0.816273	9268.78	3.90198	9.88569	597742	0.332754	0.663826	0.388222	9.88569	1.22436	0.898839	0.754389	0.87824	86.9819	0.946863	-0.816273	10364.5	1.35915	0.152235	1532.95	1216.09	709.795	5162.67	1474.22	10571.9	2330.04	1235.18	1216.09	-926878	0.251693
26	0.40737	0.822688	8062.92	4.93609	10.2796	519963	0.342367	0.668656	0.383067	10.2796	1.23397	0.902715	0.728474	0.915069	81.4449	0.954303	-0.822688	8973.97	1.54412	0.213872	1148.61	1079.7	657.289	4375.75	1241.39	9147.56	1974.98	1002.51	1079.7	-806292	0.261499
27	0.557234	0.585124	8746.24	51.3054	3.82071	564741	0.138761	0.485807	0.0278896	3.82071	0.877656	0.738261	0.618333	0.68701	71.5376	0.678736	-0.585124	12246	1.29115	0.127074	3175.38	3523.3	3027.81	8959.8	3565.47	12914.1	5140.38	1003.8	3523.3	-874624	0.317204
28	0.390078	0.826151	7405.18	5.76078	10.5043	469628	0.288848	0.705708	0.403619	10.5043	1.23916	0.904795	0.746083	0.935651	78.2163	0.958318	-0.826151	8221.32	1.6508	0.24551	855.386	1001.07	709.696	4515.89	1048.91	8341.71	1612.76	645.32	1001.07	-740518	0.248697
29	0.430426	0.736507	8247.71	6.08668	6.59033	533635	0.247273	0.598172	0.241119	6.59033	1.10471	0.848256	0.697747	0.826163	77.9391	0.854336	-0.736507	9834.36	1.37265	0.157061	1780.98	1728.53	1222.17	5867.85	1899.14	10133.7	2855.36	1056.21	1728.53	-824771	0.293974
30	0.583172	0.558879	8035.31	5.87206	3.5339	494330	0.0459231	0.526468	0.0459107	3.5339	0.838289	0.717018	0.6941	0.603945	67.0132	0.648292	-0.558879	11646.5	1.12739	0.0598806	3083.58	3367.05	3261.15	10222.4	3320.25	12154.2	4705.46	320.832	3367.05	-803531	0.274103
31	0.387196	0.878424	12476.9	3.68888	15.4507	799858	0.425895	0.723025	0.508205	15.4507	1.31759	0.935276	0.774697	0.943944	104.69	1.01896	-0.878424	13368.3	1.55446	0.217055	1379.55	1076.49	540.384	5371.19	1360.72	13539.2	2311.74	1511.54	1076.49	-1.24769e+06	0.215627
32	0.473656	0.531553	6389.22	2.27934	3.26943	397068	0.0573987	0.489076	0.0386882	3.26943	0.797297	0.694125	0.725588	0.497903	58.277	0.616594	-0.531553	9625.5	0.904087	-0.0503724	3493.27	2676.93	2268.98	8205.26	2981.86	10130.4	4230.9	702.293	2676.93	-638922	0.252226
33	0.390078	0.876471	11429	3.75824	15.1905	729678	0.405442	0.730683	0.509893	15.1905	1.31466	0.934167	0.779696	0.944565	100.086	1.01669	-0.876471	12260.9	1.56696	0.220867	1214.99	1008.18	533.886	5175.64	1238.28	12407.8	2067.18	1272.19	1008.18	-1.1429e+06	0.212793
34	0.369904	0.899977	9628.75	4.1636	18.9953	604498	0.384789	0.788112	0.57386	18.9953	1.3499	0.947353	0.796039	0.988721	93.0895	1.04396	-0.899977	10177.9	1.89227	0.308502	636.482	736.041	449.816	4515.42	802.768	10248.9	1317.9	696.293	736.041	-962875	0.186482
35	0.447718	0.68844	9170.6	5.68522	5.4193	584219	0.169923	0.587209	0.192071	5.4193	1.03262	0.815468	0.710868	0.760721	79.4569	0.79858	-0.68844	11435.6	1.26353	0.116423	2314.72	2332.58	1860.33	7978.99	2463.56	11803.7	3586.1	901.915	2332.58	-917060	0.28666
36	0.606228	0.495739	7438.9	6.42612	2.9662	462470	0.0506144	0.45658	-0.0379425	2.9662	0.743583	0.662858	0.648443	0.531866	60.7269	0.575051	-0.495739	11842.9	1.09354	0.0446795	3828.68	3956.39	3738.65	10141	3979.99	12561.2	5643	406.435	3956.39	-743890	0.275001
37	0.511122	0.635667	9863.98	7.0061	4.48948	630960	0.147479	0.538688	0.112898	4.48948	0.95347	0.77725	0.678478	0.708047	79.1846	0.737366	-0.635667	13001.8	1.23262	0.104193	3086.74	3138.39	2588.7	9428.61	3279.53	13547	4739.95	1029.18	3138.39	-986398	0.298596
38	0.672514	0.30199	5181.48	-2.90854	1.86529	344609	0.0657599	0.241016	-0.276173	1.86529	0.452971	0.463878	0.418409	0.37285	39.557	0.350305	-0.30199	12673.6	1.14789	0.0688551	5951.04	6415.7	6025.51	9791.25	6395.79	14397.3	9084.21	844.074	6415.7	-518148	0.241217
39	0.488066	0.693212	10096	4.66425	5.51916	656004	0.219437	0.558774	0.187632	5.51916	1.03978	0.818807	0.699156	0.750398	83.6581	0.804117	-0.693212	12530.8	1.21298	0.0962428	2877.32	2460.48	1734.58	7892.48	2792.33	13007.8	4143.92	1478.72	2460.48	-1.0096e+06	0.295103
40	0.496712	0.580619	7416.62	2.90829	3.76893	466018	0.0893353	0.51816	0.0845312	3.76893	0.870894	0.734663	0.723594	0.575733	65.6219	0.673509	-0.580619	10444.4	0.985213	-0.00744848	3252.12	2658.64	2206.08	8439.35	2929.51	10924.8	4176.15	771.711	2658.64	-741662	0.265587
41	0.395842	0.763693	7041.32	4.97103	7.46358	441312	0.177695	0.678007	0.325961	7.46358	1.14548	0.866009	0.765267	0.842466	73.3308	0.885869	-0.763693	8203.36	1.36185	0.153206	1145.65	1271.29	1035.88	5677.12	1303.71	8350.41	1902.89	477.014	1271.29	-704132	0.252114
42	0.531296	0.466493	6626.15	-8.0857	2.74878	441731	0.127165	0.360727	-0.124424	2.74878	0.699715	0.636191	0.514094	0.566191	55.5972	0.541126	-0.466493	11083	1.23863	0.106598	3950.37	4216.94	3634.24	8065.12	4305.79	12115	6188.59	1122	4216.94	-662615	0.314832
43	0.597582	0.22957	3170.2	-2.52016	1.59595	210719	0.0459722	0.185556	-0.332792	1.59595	0.344342	0.373401	0.378026	0.274565	26.9774	0.266298	-0.22957	10018.7	1.09164	0.043814	5342.62	5557.97	5296.6	7743.49	5570	11592.6	7893.84	513.29	5557.97	-317020	0.193495
44	0.505358	0.515586	7215.76	15.1058	3.1287	451849	0.0651658	0.466079	-0.0281046	3.1287	0.773351	0.680368	0.634312	0.58076	60.9946	0.598072	-0.515586	11134.1	1.17023	0.0784369	3300.51	3666.93	3481.41	9307.84	3618.34	11784.9	5138.88	483.99	3666.93	-721576	0.288425
45	0.433308	0.690202	9232.7	3.64482	5.45581	587077	0.166507	0.591694	0.215731	5.45581	1.03526	0.816703	0.744064	0.722215	79.8275	0.800624	-0.690202	11493.1	1.12	0.0566059	2589.21	2192.86	1658.2	8077.48	2451.29	11853.3	3564.13	1010.38	2192.86	-923270	0.269369
46	0.413134	0.643651	6283.84	3.06939	4.61247	400196	0.142711	0.551608	0.157725	4.61247	0.965427	0.783186	0.737381	0.650344	63.5972	0.746623	-0.643651	8209.72	1.02276	0.0112524	2267.02	1759.17	1334.71	6019.29	2008.28	8530.86	2898.59	791.522	1759.17	-628384	0.270157
47	0.387196	0.653925	5808.37	4.1806	4.7791	375206	0.178425	0.538308	0.144773	4.7791	0.980832	0.790744	0.701064	0.693779	61.6299	0.758539	-0.653925	7504.43	1.13598	0.0636613	1940.67	1638.14	1217.26	5121.04	1840.75	7821.54	2687.44	809.916	1638.14	-580837	0.290842
48	0.390078	0.613527	6346.47	3.92914	4.17501	414862	0.175649	0.490766	0.0860341	4.17501	0.920246	0.760468	0.676994	0.641239	62.3998	0.71168	-0.613527	8581.41	1.08738	0.0418604	2621.64	2084.39	1524.07	5851.67	2387.1	9042.52	3481.68	1088.19	2084.39	-634647	0.297993
49	0.424662	0.666807	7991.56	4.60364	5.00252	513125	0.17393	0.557538	0.163257	5.00252	1.00017	0.800093	0.706232	0.717527	72.9988	0.773485	-0.666807	10185.8	1.17726	0.0814146	2410.19	2166.38	1654.04	7028.47	2380.19	10573.6	3469.51	971.577	2166.38	-799156	0.288647
50	0.40737	0.675156	6993.74	4.43127	5.1568	456738	0.21614	0.537444	0.161018	5.1568	1.01269	0.806072	0.691122	0.724154	68.7158	0.783169	-0.675156	8837.84	1.17497	0.0804453	2221.62	1823.74	1274.18	5592.23	2095.67	9215.28	3105.57	1123.47	1823.74	-699374	0.298982
51	0.384314	0.762685	9228.98	4.62045	7.4276	591823	0.248999	0.634108	0.301097	7.4276	1.14398	0.865362	0.736165	0.833779	83.8975	0.884702	-0.762685	10761	1.32673	0.140426	1799.88	1653.85	1145.42	6412.56	1851.68	11022.8	2786.39	1067.62	1653.85	-922898	0.270576
52	0.390078	0.714455	9909.92	4.28031	6.00415	618816	0.132609	0.642741	0.261266	6.00415	1.07164	0.833443	0.763608	0.767686	84.1439	0.828758	-0.714455	12054	1.21092	0.0953981	2135.46	2179.2	1836.49	9105.98	2262.94	12328.3	3257.06	633.982	2179.2	-990992	0.256713
53	0.381432	0.647218	7572.98	4.26452	4.66922	485749	0.159657	0.543748	0.140918	4.66922	0.970785	0.785823	0.705232	0.687651	70.0098	0.750762	-0.647218	9855.44	1.13583	0.0635939	2507.58	2199.63	1698.76	6983.36	2424.54	10258.7	3517.36	932.189	2199.63	-757298	0.287213
54	0.583172	0.278084	4071.89	-3.82484	1.7704	241446	-0.00682698	0.284371	-0.271448	1.7704	0.417111	0.435144	0.488492	0.327545	33.6501	0.322574	-0.278084	10746.8	1.10322	0.0490769	4725.91	5551.47	5911.11	9485.93	5249.43	11944.7	7424.17	621.381	5551.47	-407189	0.209753
55	0.398724	0.64096	8562.06	2.76899	4.57041	548728	0.154308	0.540068	0.154877	4.57041	0.961404	0.781193	0.739807	0.634982	74.0806	0.743505	-0.64096	11219.4	0.979635	-0.0102875	3341.22	2373.52	1721.14	8029.82	2801.66	11687.1	4057.63	1272.6	2373.52	-856206	0.269777
56	0.375668	0.760768	8351.35	3.87857	7.36009	519679	0.150413	0.689223	0.344429	7.36009	1.1411	0.864126	0.793567	0.81166	79.7085	0.882478	-0.760768	9753.23	1.23485	0.105084	1439.88	1459.15	1197.46	7137.25	1527.97	9913.97	2210.34	490.598	1459.15	-835135	0.235593
57	0.39296	0.691475	7210.59	3.77608	5.48245	462948	0.190645	0.576877	0.2064	5.48245	1.03716	0.817591	0.730047	0.727555	70.6112	0.802098	-0.691475	8964.72	1.13539	0.0634022	2084.27	1714.06	1241.53	5994.96	1951.09	9271.8	2861.43	930.563	1714.06	-721059	0.278031
58	0.545706	0.33852	4249.25	-3.30901	2.02352	292507	0.101579	0.245379	-0.253669	2.02352	0.507759	0.505797	0.411209	0.419725	37.927	0.392678	-0.33852	9370.69	1.17294	0.0795878	4339.85	4496.27	3971.5	6851.52	4597.09	10664	6568.69	964.41	4496.27	-424925	0.268605
59	0.390078	0.501711	4229.56	17.5505	3.01373	285155	0.157371	0.373858	-0.0799033	3.01373	0.752521	0.668168	0.553986	0.565541	46.0653	0.581973	-0.501711	6669.29	1.16365	0.0756352	2479.18	2265.71	1779.42	4608.53	2461.57	7266.5	3568.49	899.892	2265.71	-422956	0.317143
60	0.490948	0.468529	7035.66	3.96111	2.76314	425288	0.00976811	0.46087	-0.0476774	2.76314	0.70277	0.638083	0.673056	0.476408	57.4144	0.543488	-0.468529	11725.9	1.02008	0.00994074	3989.03	4030.28	3991.79	10812.7	4029.58	12411.9	5699.23	78.7391	4030.28	-703566	0.253966
