# Supplementary material for: Inversion model of soil salinity in alfalfa covered farmland based on sensitive variable selection and machine learning algorithms
Source: PeerJ journal article supplement (doi:10.7717/peerj.18186), 2024-09-26
Supplement: Supplementary_Dataset_2.xlsx [file Supplementary_Dataset_2.xlsx]

## Sheet: Sheet1
sampling points	East Longitude	North latitude
1	98.5362	39.8349
2	98.5363	39.8348
3	98.5363	39.8346
4	98.5363	39.8345
5	98.5364	39.8343
6	98.5364	39.8341
7	98.5364	39.834
8	98.5365	39.8338
9	98.5359	39.8349
10	98.536	39.8348
11	98.536	39.8346
12	98.536	39.8344
13	98.536	39.8343
14	98.5361	39.8341
15	98.5361	39.834
16	98.5361	39.8338
17	98.5353	39.8349
18	98.5353	39.8348
19	98.5354	39.8346
20	98.5354	39.8345
21	98.5354	39.8343
22	98.5355	39.8341
23	98.5355	39.834
24	98.5355	39.8338
25	98.535	39.8349
26	98.5351	39.8348
27	98.5351	39.8346
28	98.5351	39.8345
29	98.5352	39.8343
30	98.5352	39.8341
31	98.5352	39.834
32	98.5352	39.8338
33	98.5348	39.8349
34	98.5348	39.8348
35	98.5348	39.8346
36	98.5348	39.8344
37	98.5349	39.8343
38	98.5349	39.8341
39	98.5349	39.834
40	98.535	39.8338
41	98.5344	39.8349
42	98.5344	39.8348
43	98.5345	39.8346
44	98.5345	39.8344
45	98.5345	39.8343
46	98.5346	39.8341
47	98.5346	39.834
48	98.5346	39.8338
49	98.5341	39.8349
50	98.5341	39.8348
51	98.5342	39.8346
52	98.5342	39.8344
53	98.5342	39.8343
54	98.5343	39.8341
55	98.5343	39.834
56	98.5343	39.8338
57	98.5339	39.8349
58	98.5339	39.8348
59	98.5339	39.8346
60	98.534	39.8345
61	98.534	39.8343
62	98.534	39.8341
63	98.534	39.834
64	98.5341	39.8338
